# Supplementary material for: Melatonin attenuates Drp1-mediated excessive mitochondrial fission through SIRT1 upregulation in granulosa cells of PCOS
Source: Research Square preprint supplement (doi:10.21203/rs.3.rs-6142175/v1), 2025-03-11

Supplementary Figures. Raw data of western blotting

1. Drp1 of mouse ovary samples in Fig.2G


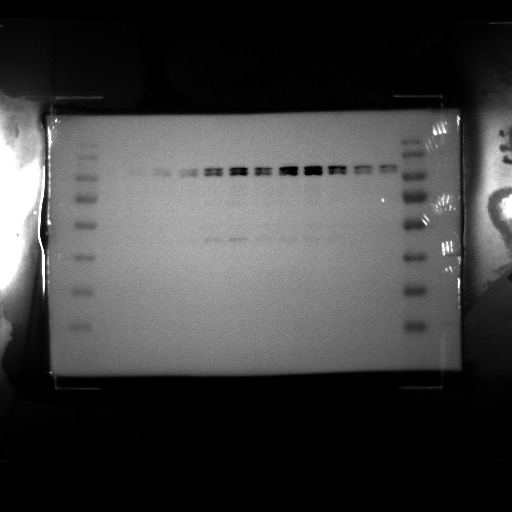


1. VDAC1 of mouse ovary samples in Fig.2G


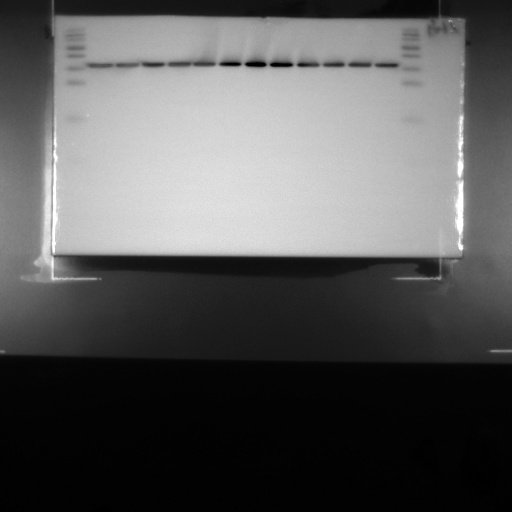


1. Drp1 of KGN cell samples in Fig.3A


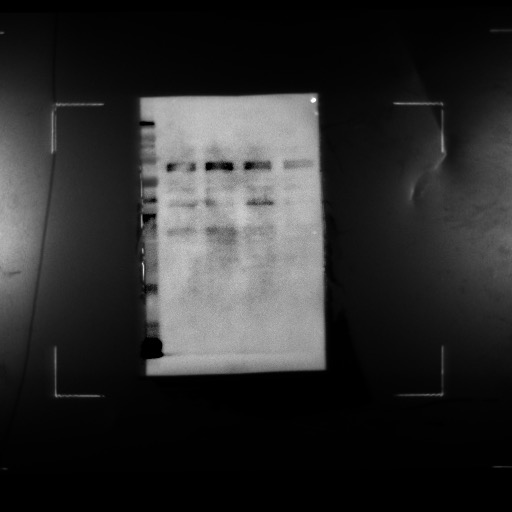


1. VDAC1 of KGN cell samples in Fig.3A


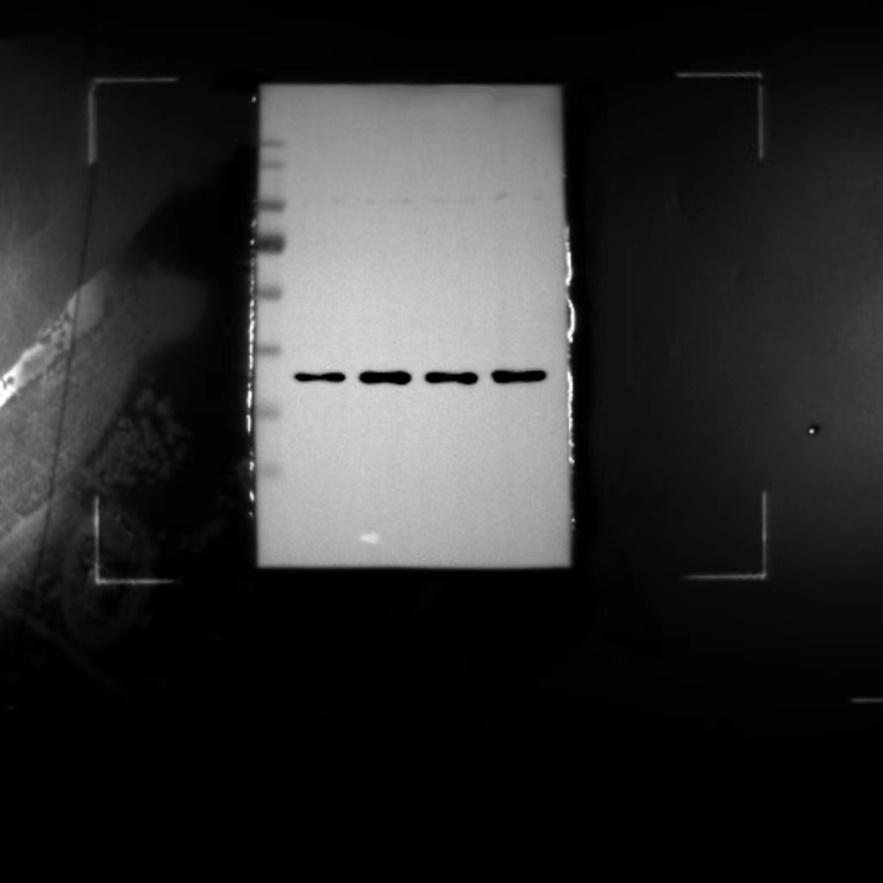


1. Drp1 of mouse ovary samples in Fig.4D


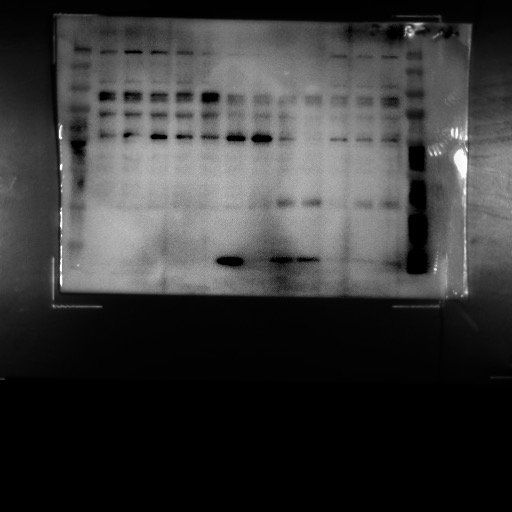


1. VDAC1 of mouse ovary samples in Fig.4D


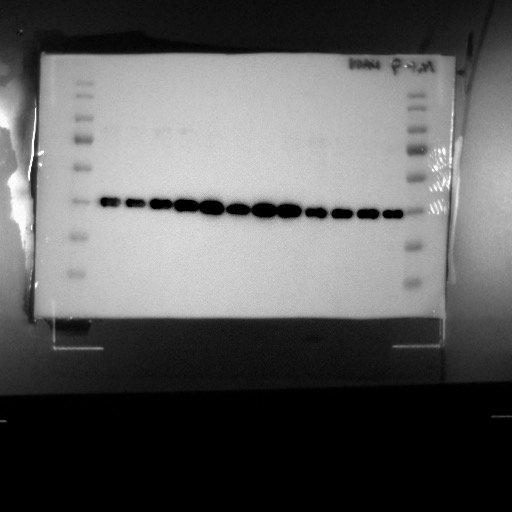


1. SIRT1 of KGN cell samples in Fig.5A


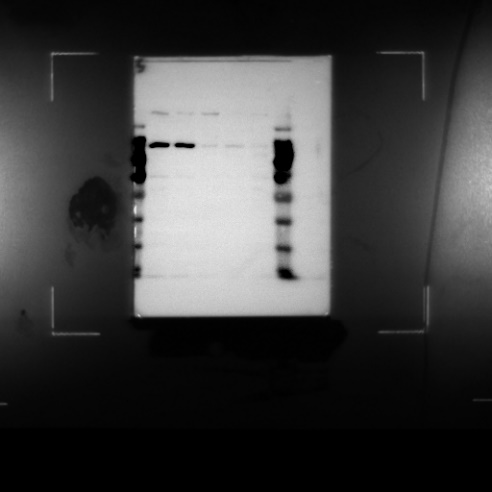


1. GAPDH of KGN cell samples in Fig.5A


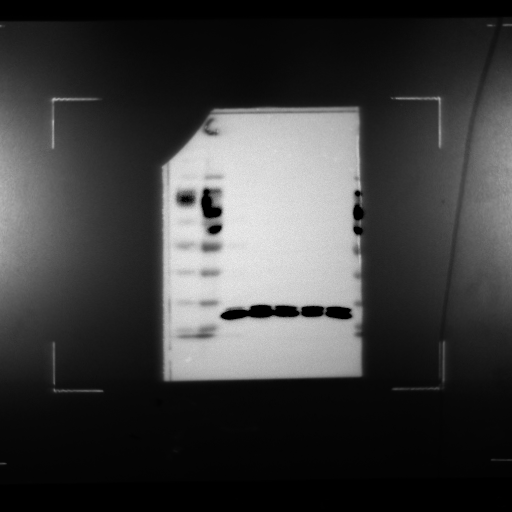


1. SIRT1 of KGN cell samples in Fig.5B


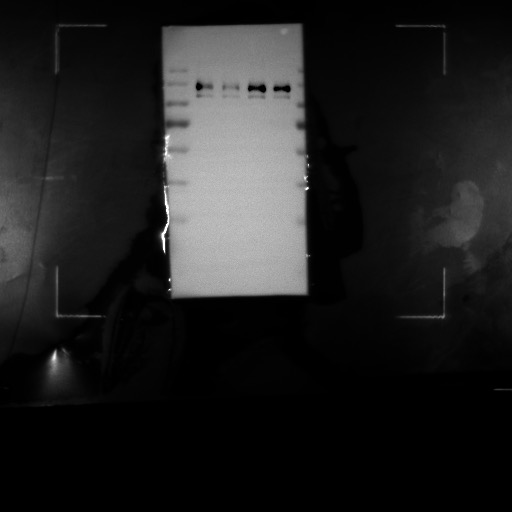


1. GAPDH of KGN cell samples in Fig.5B


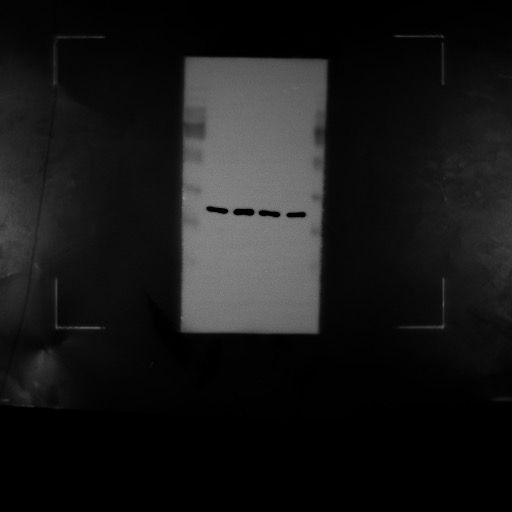


1. Drp1 of KGN cell samples in Fig.5D


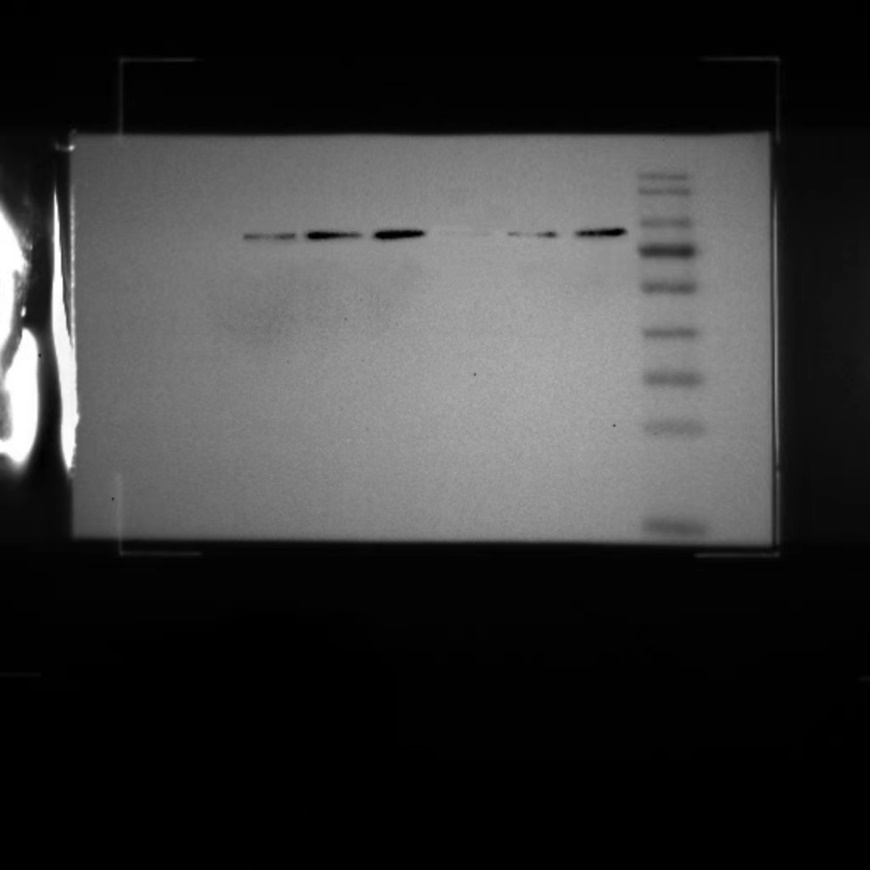


1. VDAC1 of KGN cell samples in Fig.5D


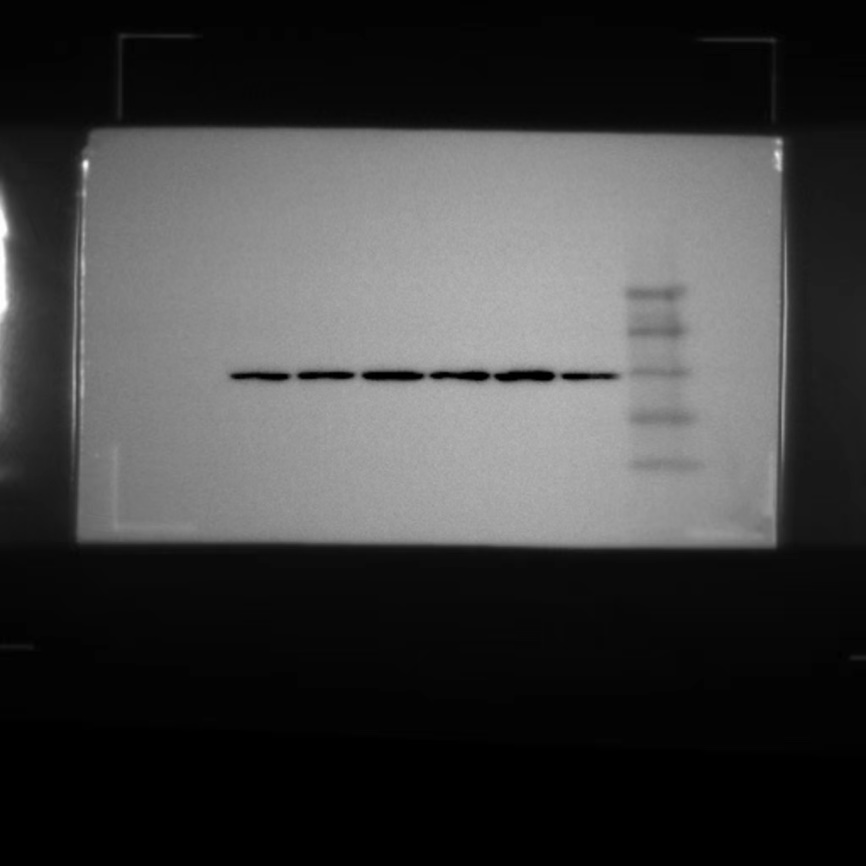

Supplement: Supplementary file 1 [file de55c31afcaf311507afcece.docx]
